# Supplementary material for: Synthesis, Molecular Docking, and Bioactivity Study of Novel Hybrid Benzimidazole Urea Derivatives: A Promising α-Amylase and α-Glucosidase Inhibitor Candidate with Antioxidant Activity
Source: MDPI journal article supplement (doi:10.3390/pharmaceutics15020457), 2023-01-30
Supplement: s1 [file s1]

## **Supplementary Materials:**

# **Synthesis, Molecular Docking, and Bioactivity Study of Novel Hybrid Benzimidazole Urea Derivatives: A Promising $\alpha$ -amylase and $\alpha$ -Glucosidase Inhibitor Candidate with Antioxidant Activity**

Lotfi M. Aroua, Abdulelah H. Alosaimi, Fahad M Alminderej, Sabri Messaoudi, Hamdoon A. Mohammed, Suliman A. Almahmoud, Sridevi Chigurupati, Abuzar E. A. E. Albadri and Nejib H. Mekni

## Table of Contents

|                                                                          |    |
|--------------------------------------------------------------------------|----|
| <b>Figure S-1:</b> FTIR spectrum of compound <b>3a</b>                   | 3  |
| <b>Figure S-2:</b> <sup>1</sup> H-NMR spectrum of compound <b>3a</b> .   | 3  |
| <b>Figure S- 3:</b> <sup>13</sup> C NMR spectrum of compound <b>3a</b>   | 4  |
| <b>Figure S-4:</b> HRMS spectrum of compound <b>3a</b>                   | 4  |
| <b>Figure S-5:</b> FTIR spectrum of compound <b>3b</b>                   | 5  |
| <b>Figure S-6:</b> <sup>1</sup> H-NMR spectrum of compound <b>3b</b> .   | 5  |
| <b>Figure S-7:</b> <sup>13</sup> C-NMR spectrum of compound <b>3b</b> .  | 6  |
| <b>Figure S-8:</b> HRMS spectrum of compound <b>3b</b>                   | 6  |
| <b>Figure S-9:</b> FTIR spectrum of compound <b>3c</b>                   | 7  |
| <b>Figure S-10:</b> <sup>1</sup> H-NMR spectrum of compound <b>3c</b> .  | 7  |
| <b>Figure S-11:</b> <sup>13</sup> C NMR spectrum of compound <b>3c</b>   | 8  |
| <b>Figure S-12:</b> HRMS spectrum of compound <b>3c</b>                  | 8  |
| <b>Figure S-53:</b> FTIR spectrum of compound <b>3d</b>                  | 9  |
| <b>Figure S-14:</b> <sup>1</sup> H-NMR spectrum of compound <b>3d</b> .  | 9  |
| <b>Figure S- 15:</b> <sup>13</sup> C NMR spectrum of compound <b>3d</b>  | 10 |
| <b>Figure S-16:</b> HRMS spectrum of compound <b>3d</b>                  | 10 |
| <b>Figure S-67:</b> FTIR spectrum of compound <b>3e</b>                  | 11 |
| <b>Figure S-18:</b> <sup>1</sup> H-NMR spectrum of compound <b>3e</b> .  | 11 |
| <b>Figure S-19:</b> <sup>13</sup> C NMR spectrum of compound <b>3e</b>   | 12 |
| <b>Figure S-20:</b> HRMS spectrum of compound <b>3e</b>                  | 12 |
| <b>Figure S-27:</b> FTIR spectrum of compound <b>3f</b>                  | 13 |
| <b>Figure S-82:</b> <sup>1</sup> H-NMR spectrum of compound <b>3f</b> .  | 13 |
| <b>Figure S-29:</b> <sup>13</sup> C NMR spectrum of compound <b>3f</b>   | 14 |
| <b>Figure S-210:</b> HRMS spectrum of compound <b>3f</b>                 | 14 |
| <b>Figure S-25:</b> FTIR spectrum of compound <b>3g</b>                  | 15 |
| <b>Figure S-116:</b> <sup>1</sup> H-NMR spectrum of compound <b>3g</b> . | 15 |
| <b>Figure S-27:</b> <sup>13</sup> C NMR spectrum of compound <b>3g</b>   | 16 |
| <b>Figure S-28:</b> HRMS spectrum of compound <b>3g</b>                  | 16 |
| <b>Figure S-29:</b> FTIR spectrum of compound <b>3h</b>                  | 17 |
| <b>Figure S-30:</b> <sup>1</sup> H-NMR spectrum of compound <b>3h</b> .  | 17 |
| <b>Figure S- 121:</b> <sup>13</sup> C NMR spectrum of compound <b>3h</b> | 18 |
| <b>Figure S-32:</b> HRMS spectrum of compound <b>3h</b>                  | 18 |

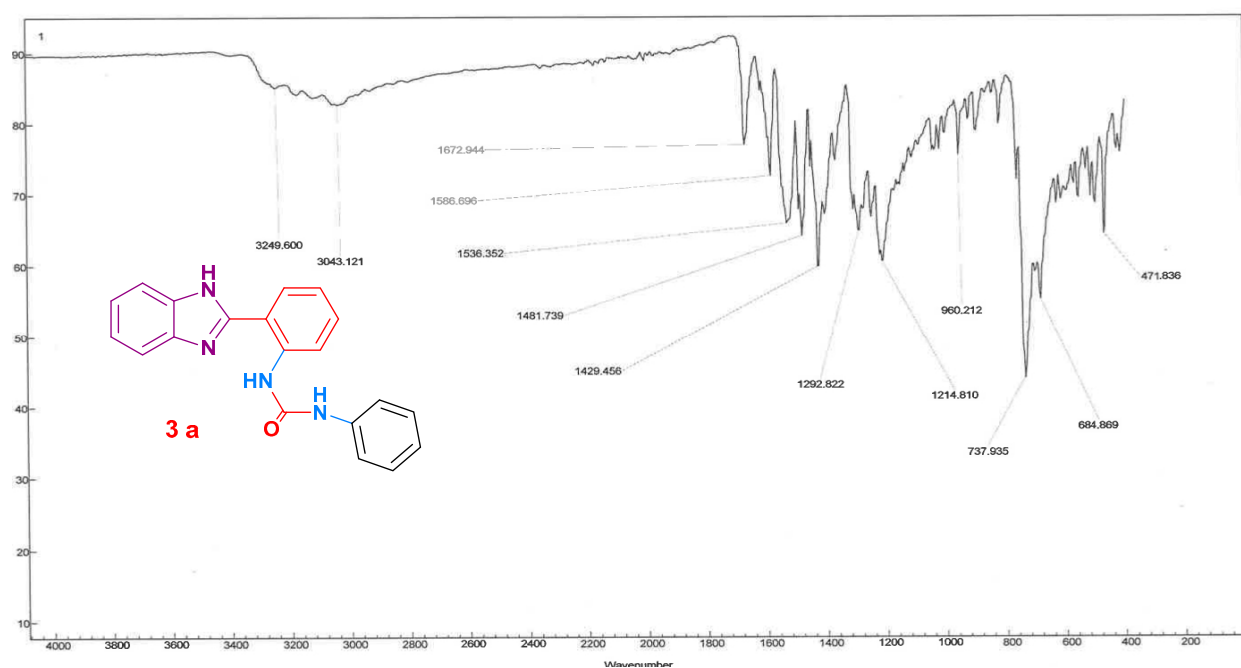

**Figure S-1:** FTIR spectrum of compound **3a**.

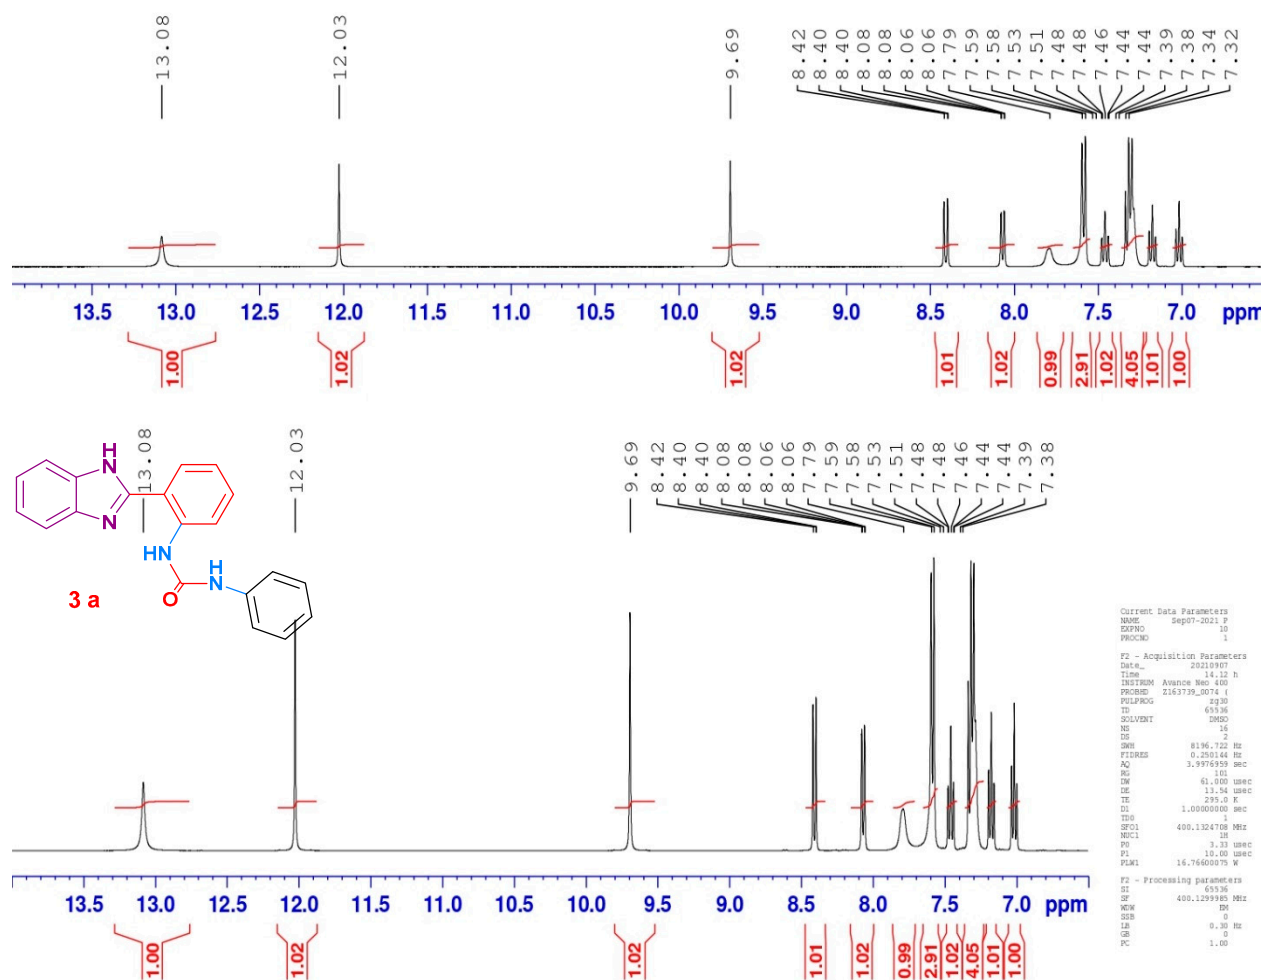

**Figure S-2:** <sup>1</sup>H-NMR spectrum of compound **3a**.

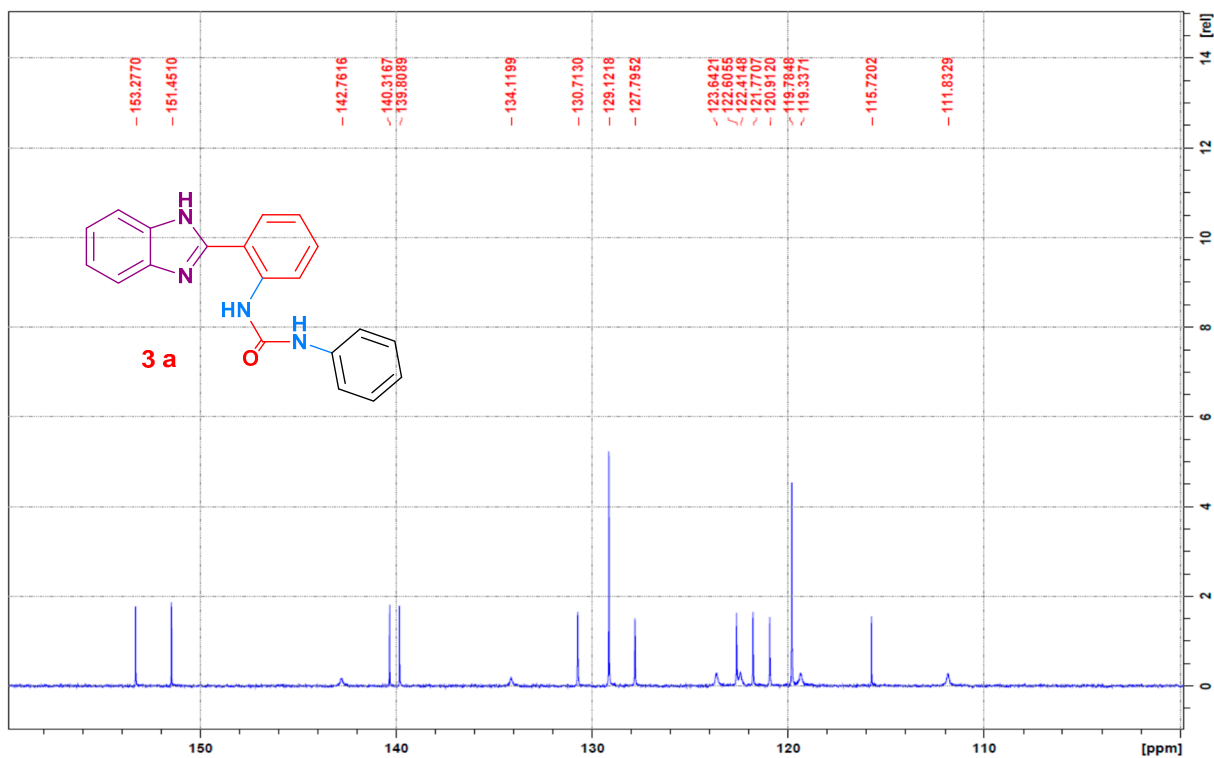

Figure S-3: <sup>13</sup>C NMR spectrum of compound 3a.

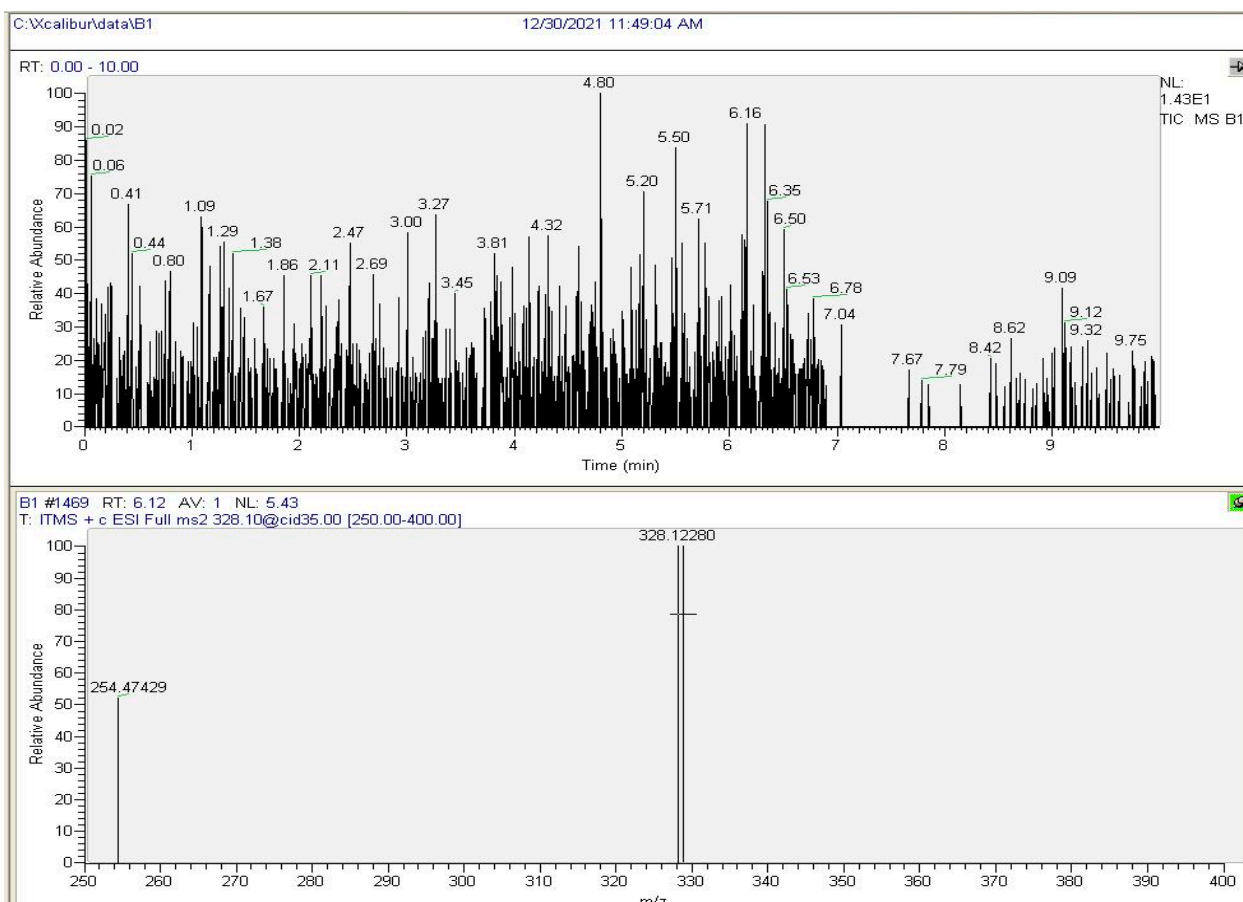

Figure S-4: Mass spectrum of compound 3a.



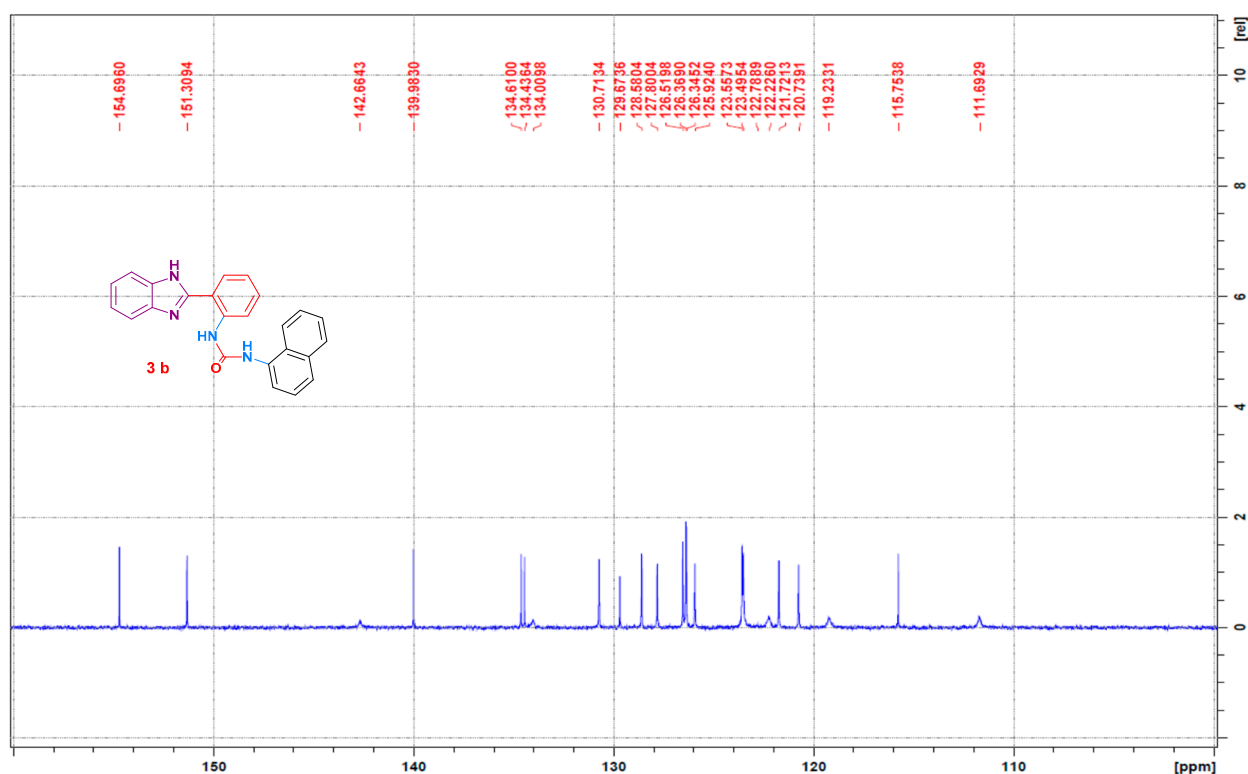

Figure S-7: <sup>13</sup>C NMR spectrum of compound 3b.

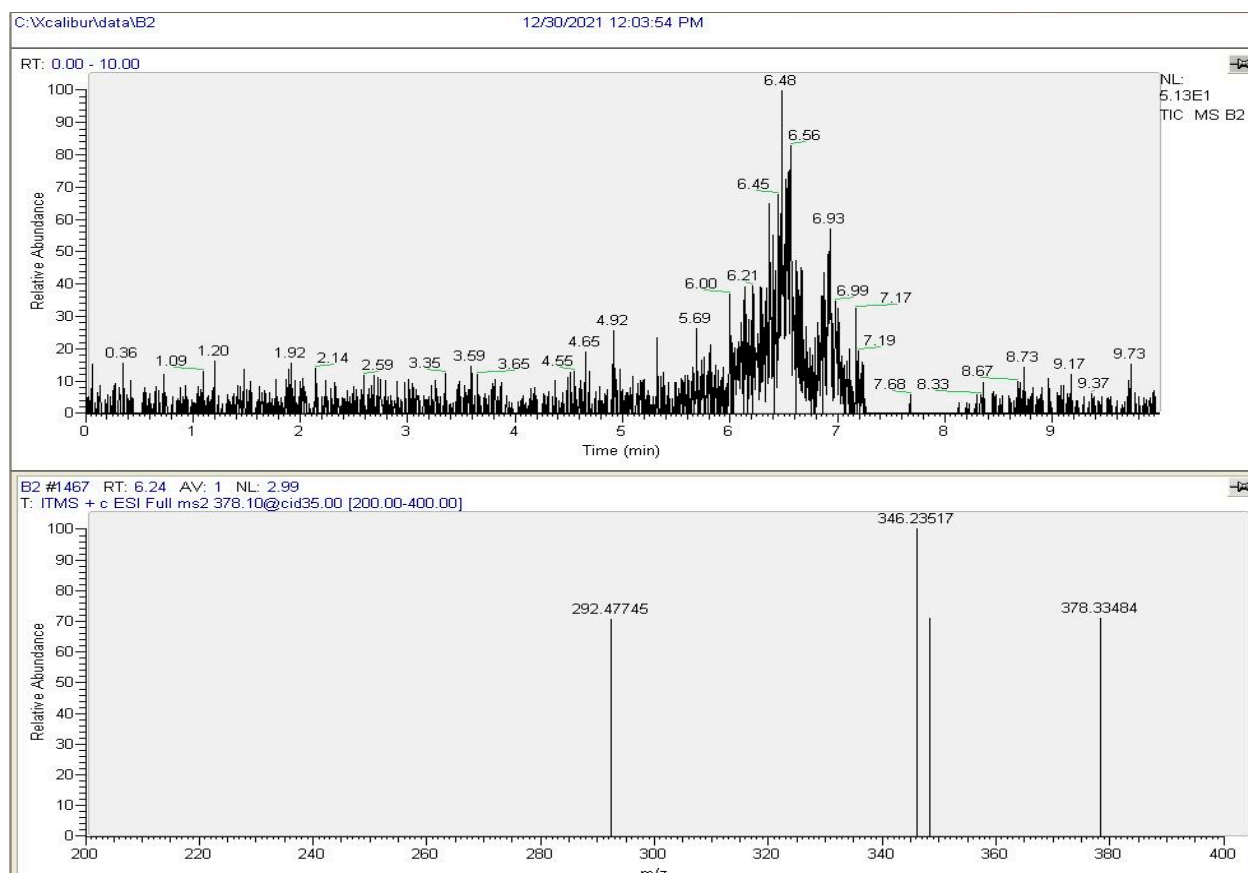

Figure S-8: Mass spectrum of compound 3b.

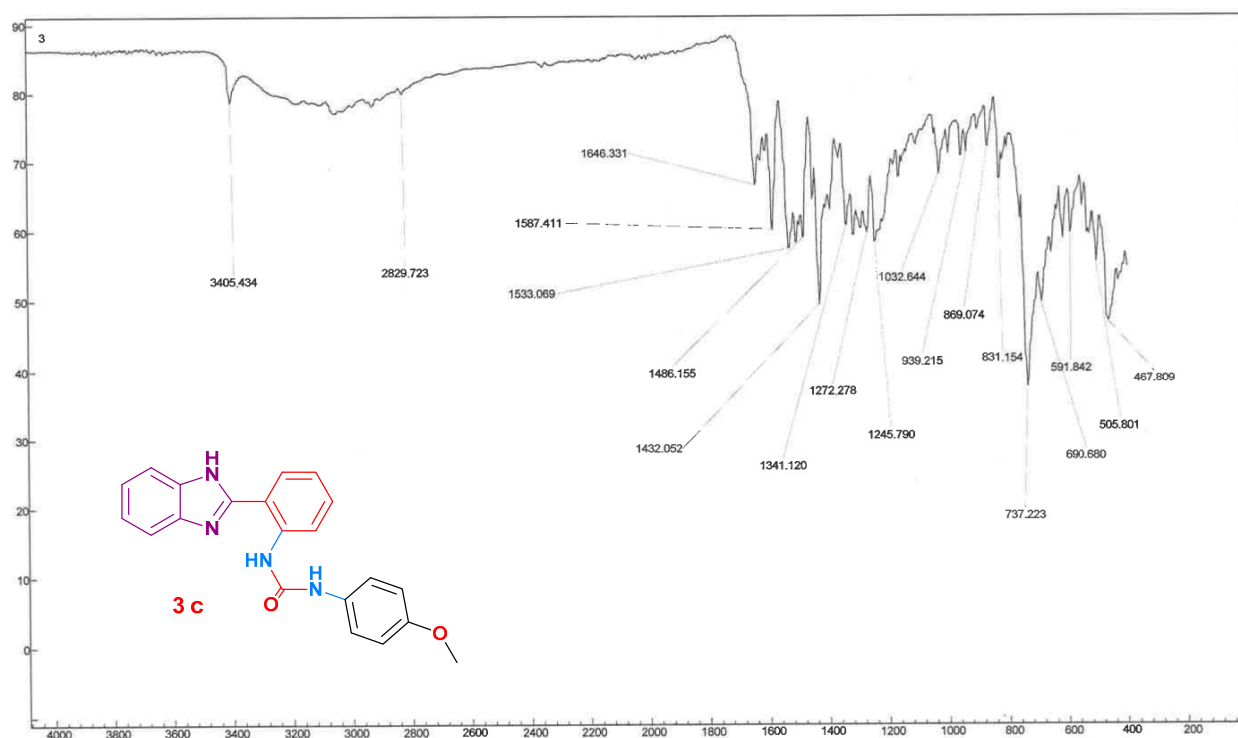

**Figure S-9:** FTIR spectrum of compound **3c**.

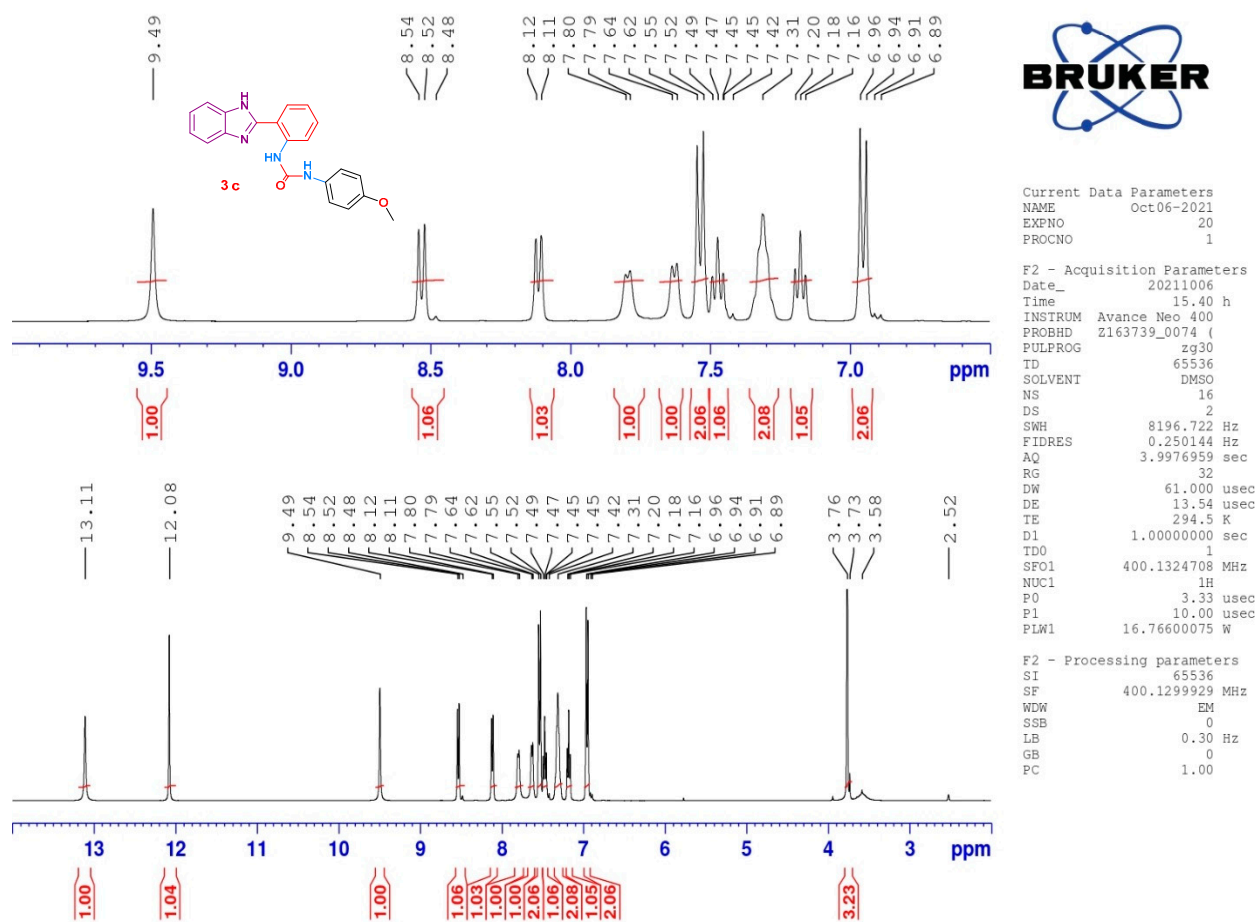

**Figure S-10:** <sup>1</sup>H-NMR spectrum of compound **3c**.



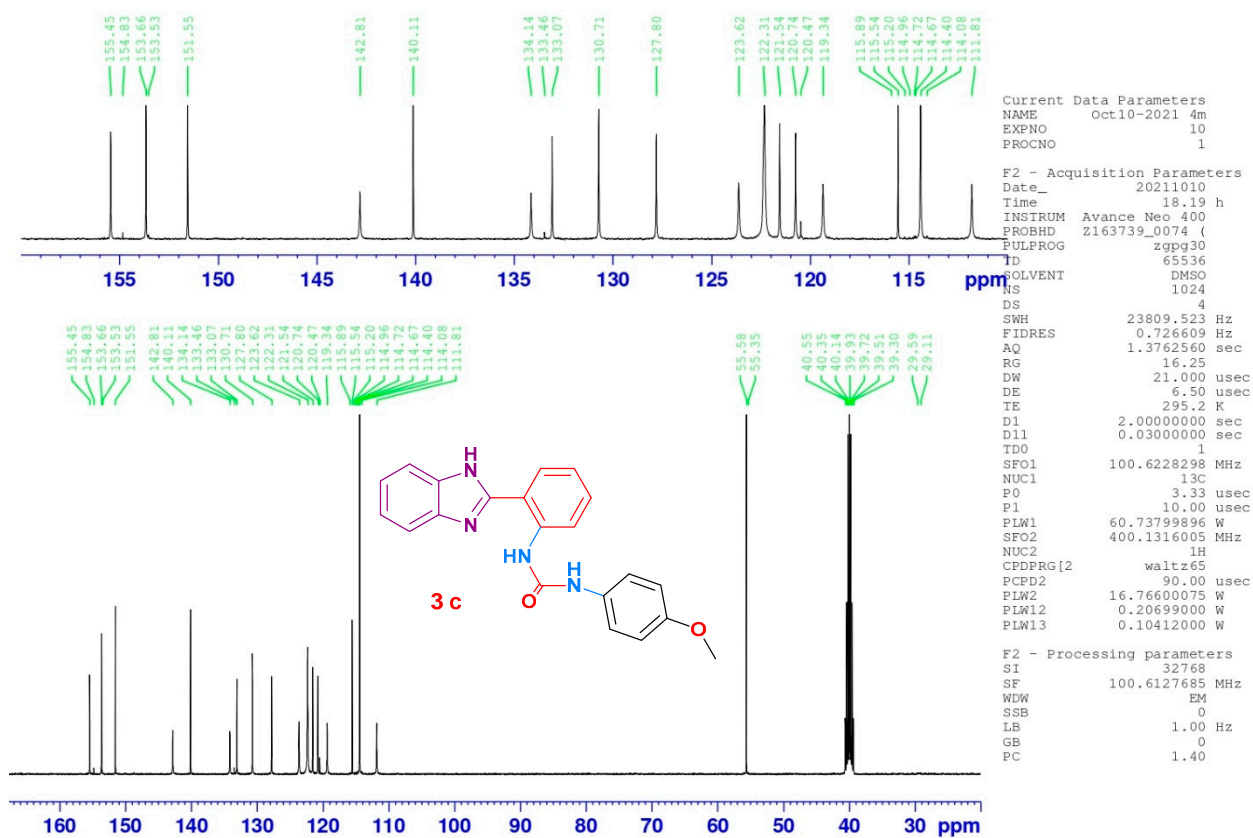

Figure S-11:  $^{13}\text{C}$  NMR spectrum of compound 3c.

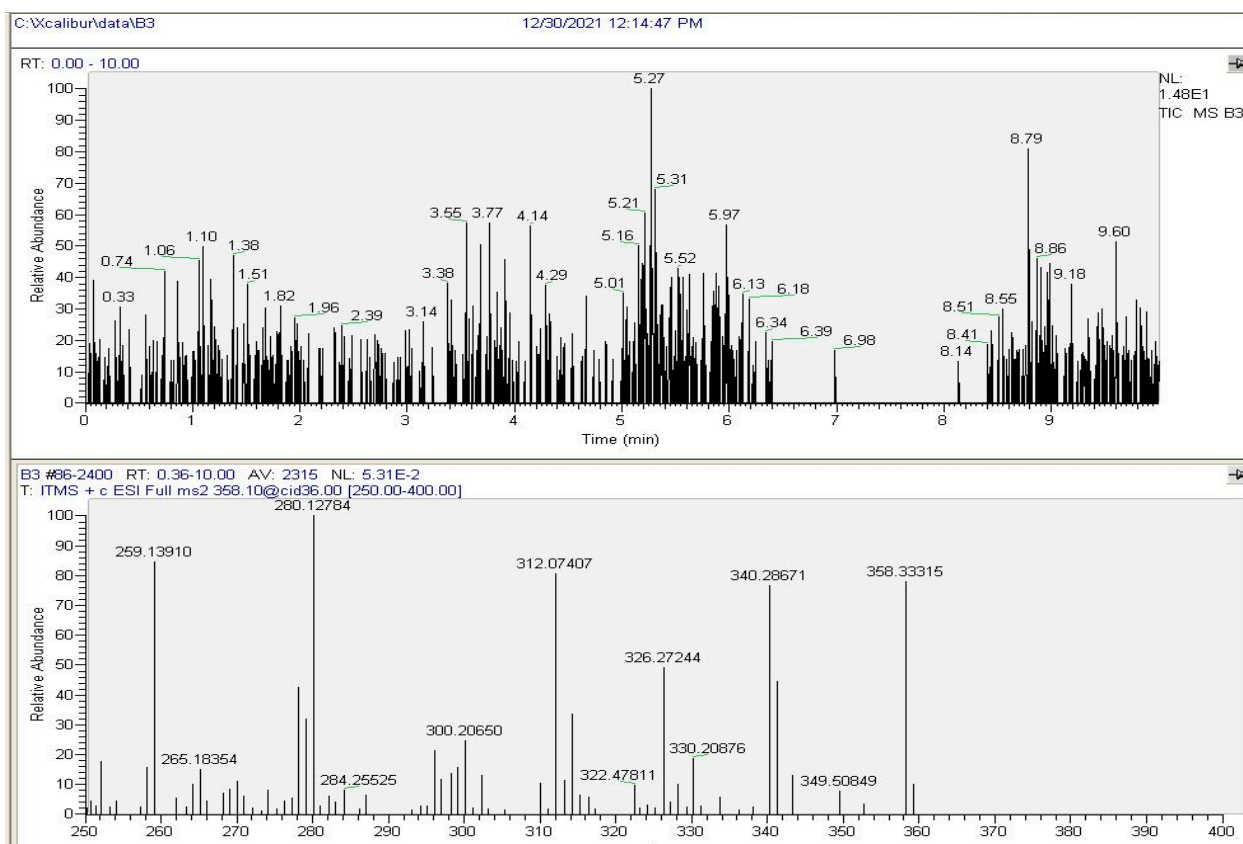

Figure S-12: Mass spectrum of compound 3c.



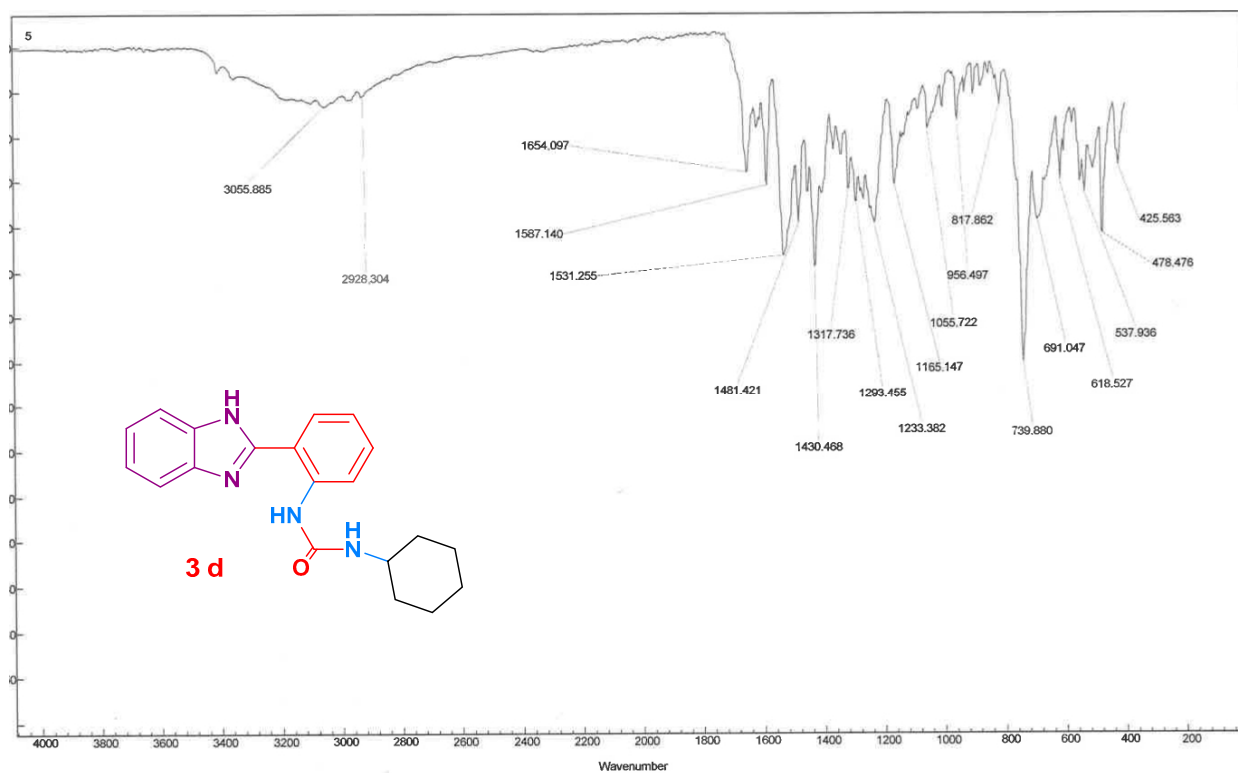

Figure S-13: FTIR spectrum of compound 3d.

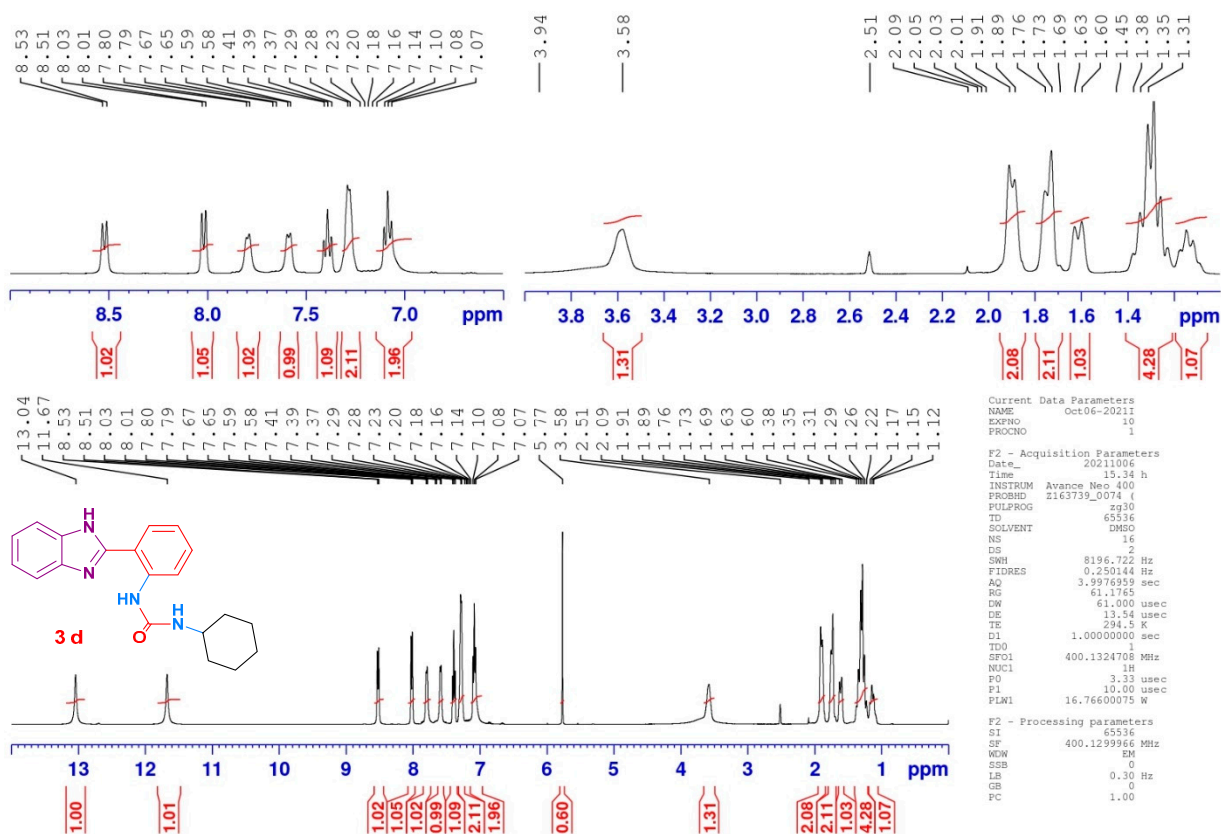

Figure S-14: <sup>1</sup>H-NMR spectrum of compound 3d.

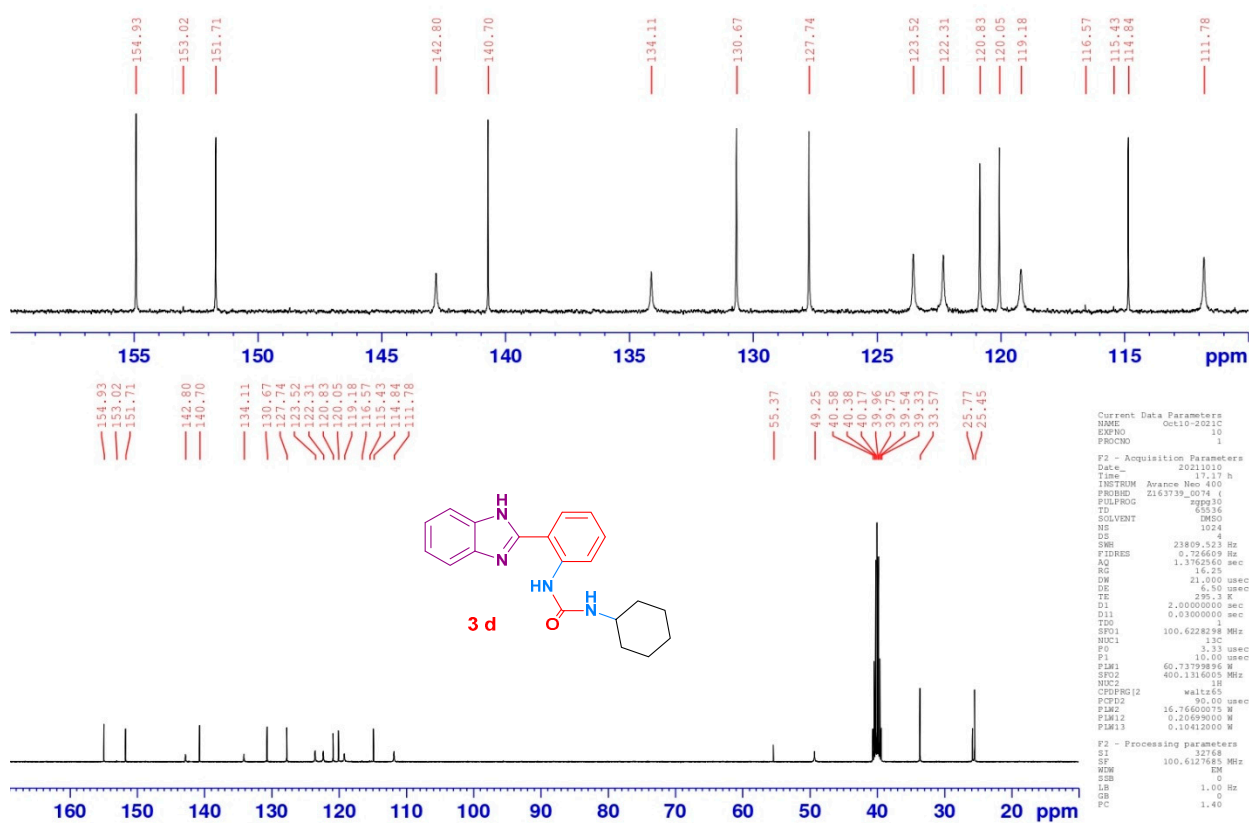

Figure S-15: <sup>13</sup>C NMR spectrum of compound 3d.

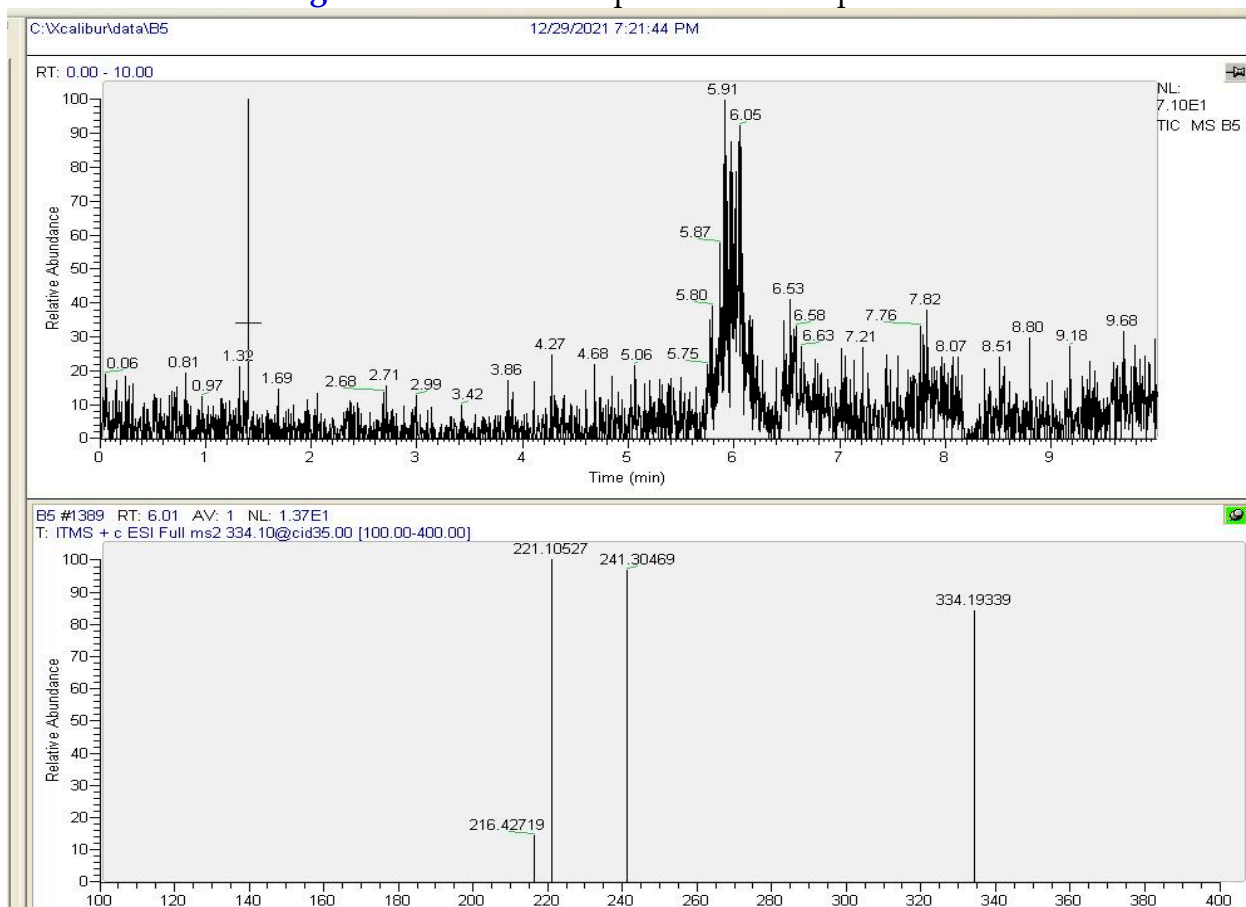

Figure S-16: Mass spectrum of compound 3d.

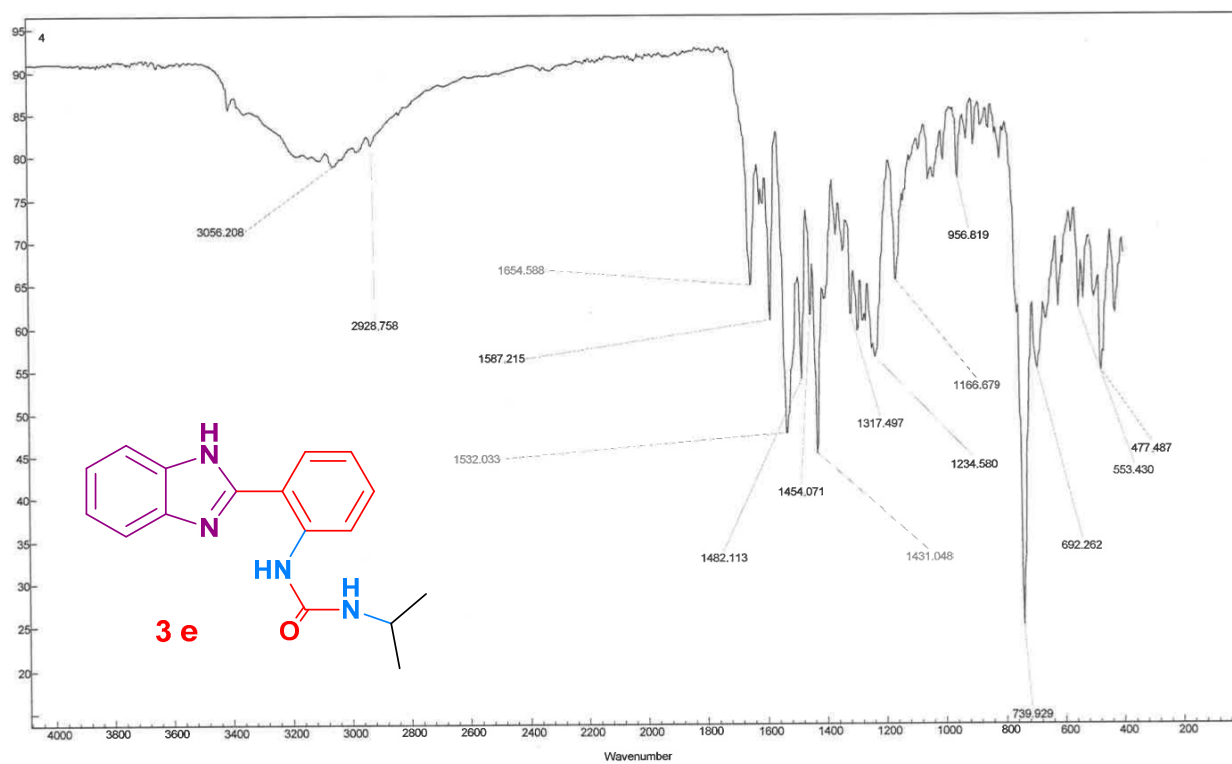

Figure S-17: FTIR spectrum of compound **3e**.

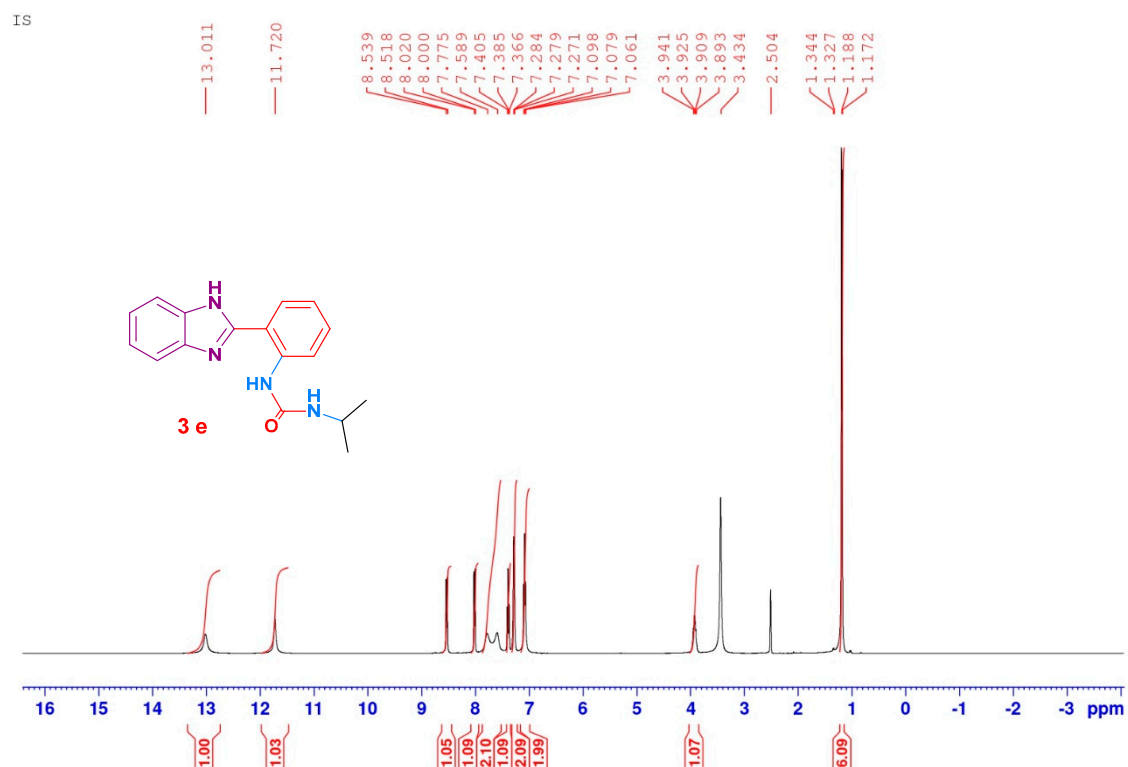

Figure S-18:  $^1\text{H}$ -NMR spectrum of compound **3e**.

IS

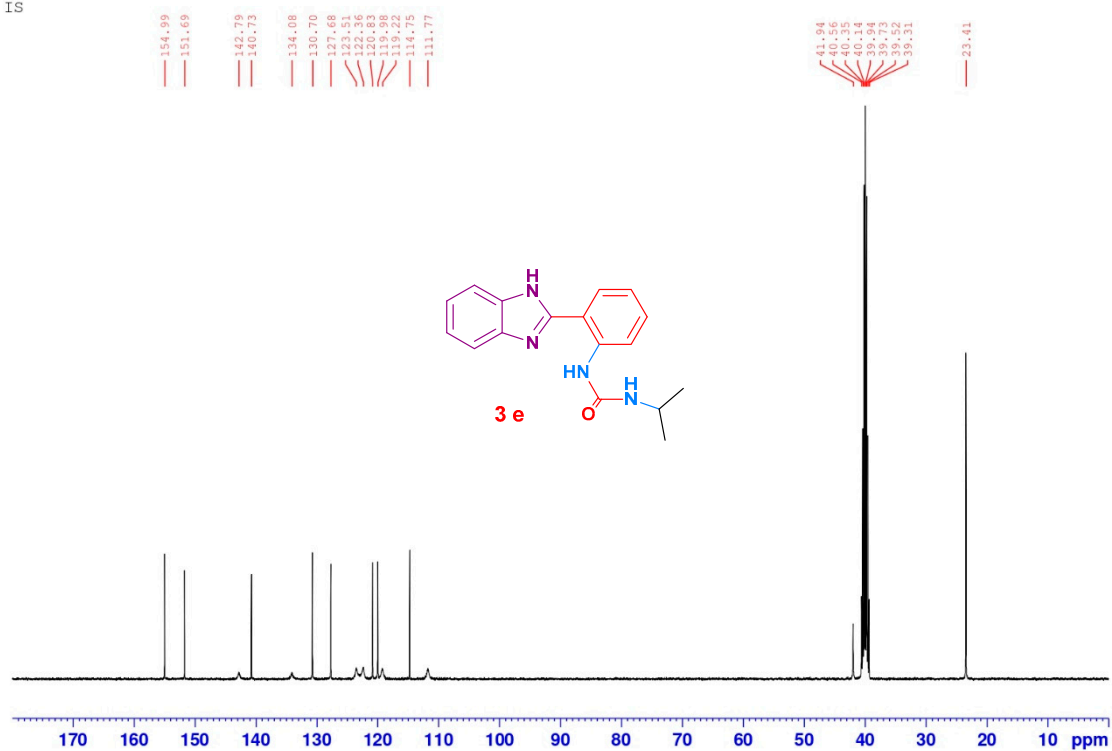

Figure S-19: <sup>13</sup>C NMR spectrum of compound 3e.

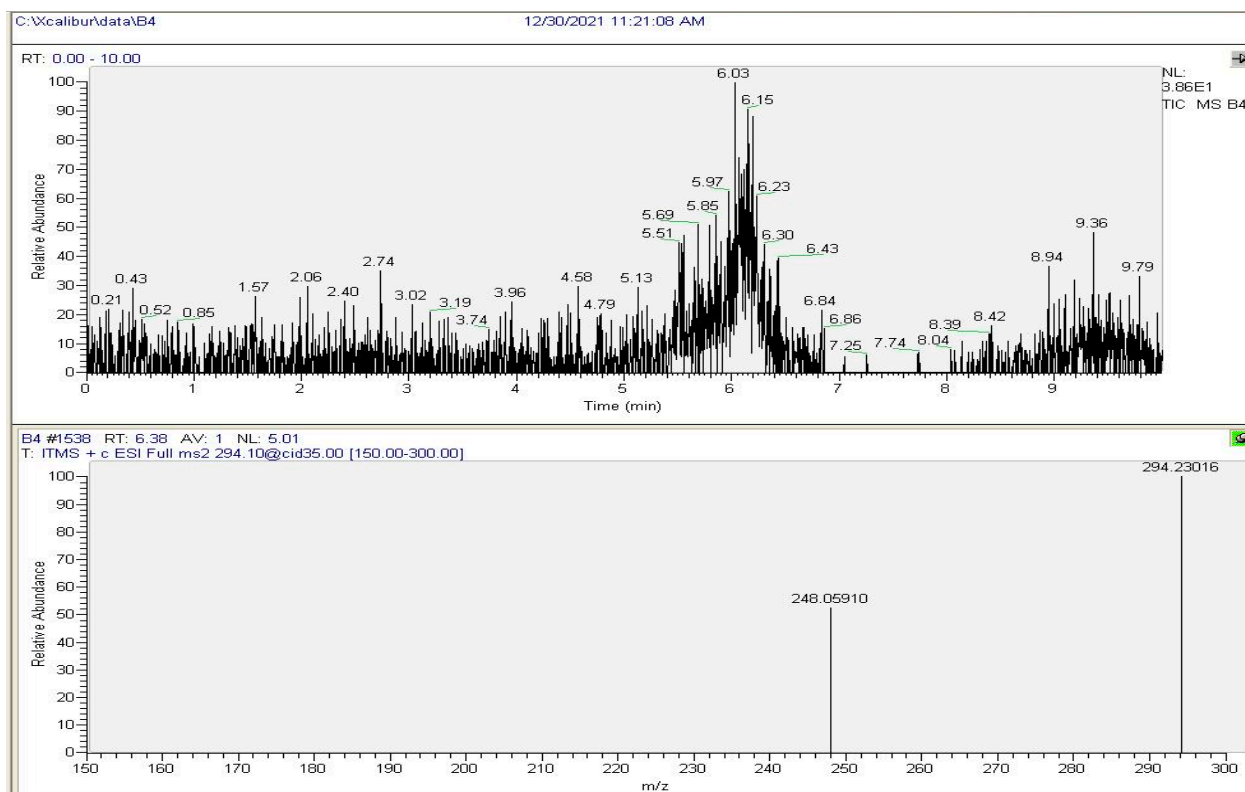

Figure S-20: Mass spectrum of compound 3e.

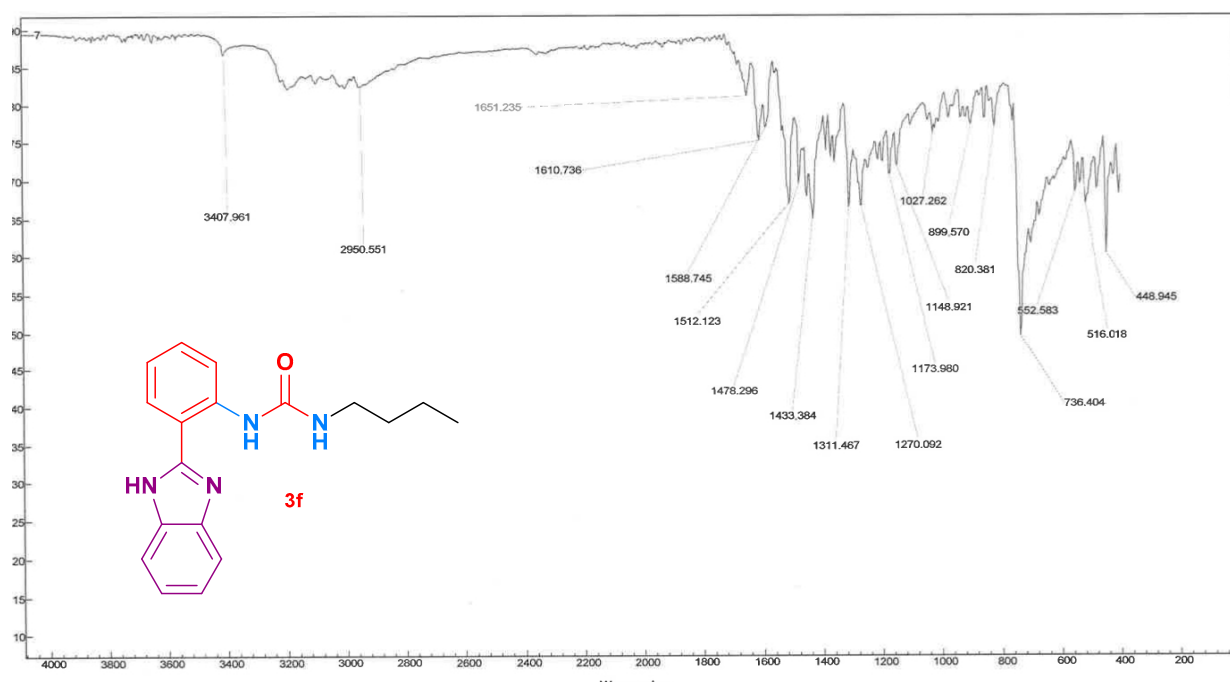

Figure S-21: FTIR spectrum of compound 3f.

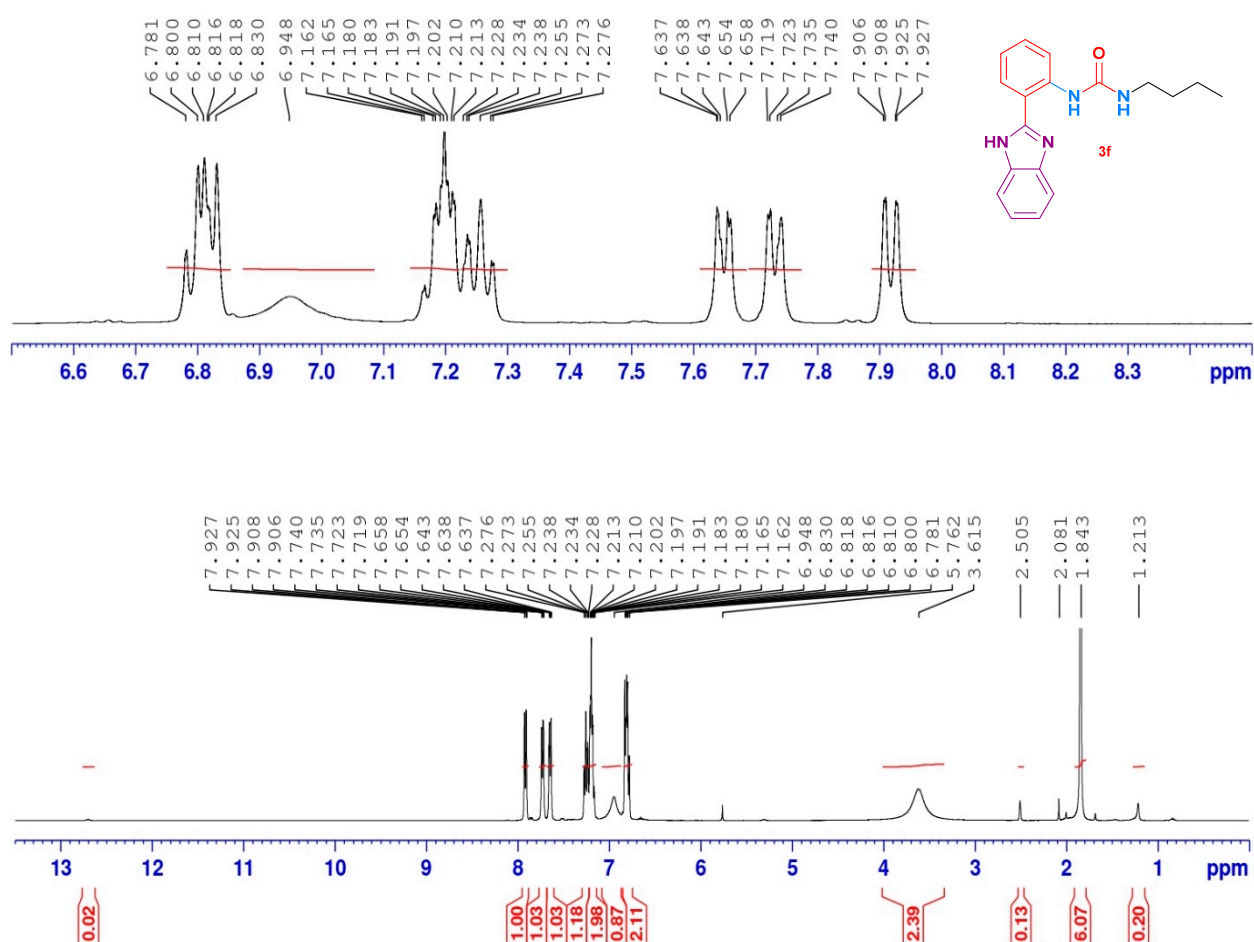

Figure S-22: <sup>1</sup>H-NMR spectrum of compound 3f.

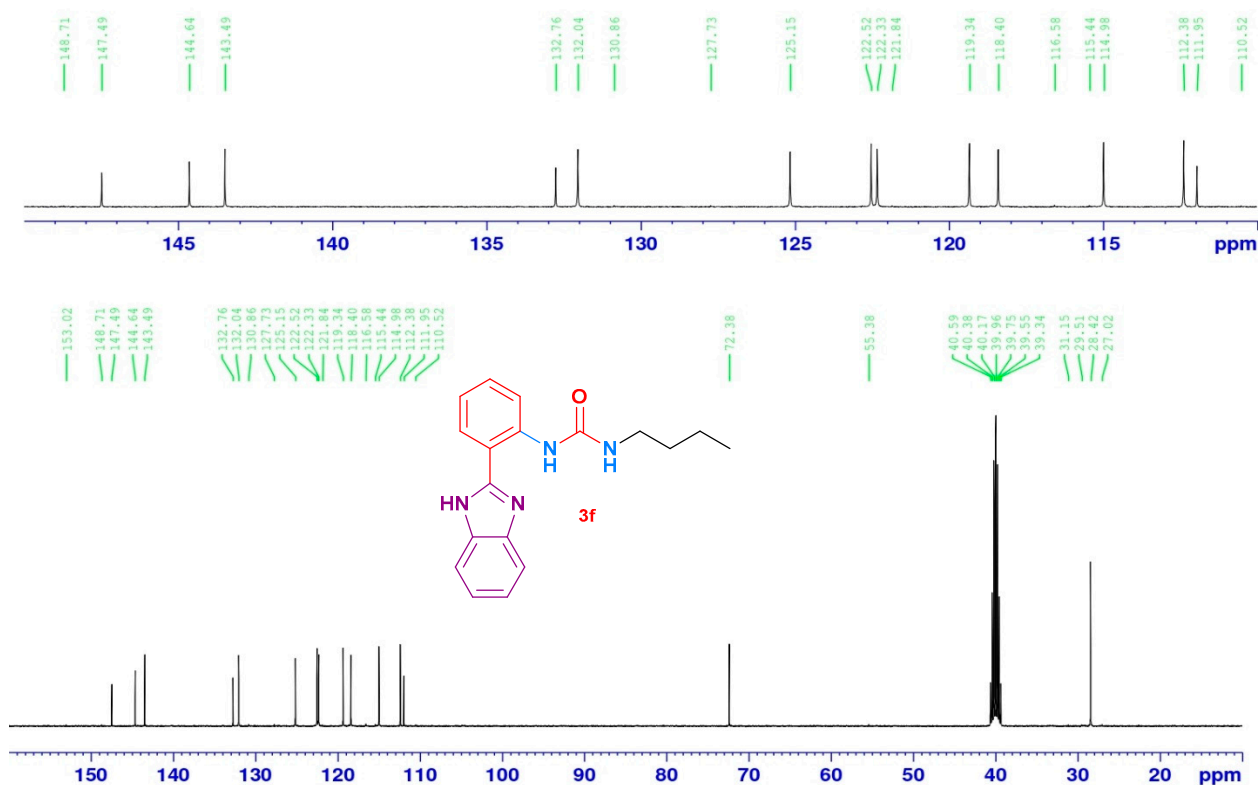

**Figure S-23:**  $^{13}\text{C}$  NMR spectrum of compound 3f.

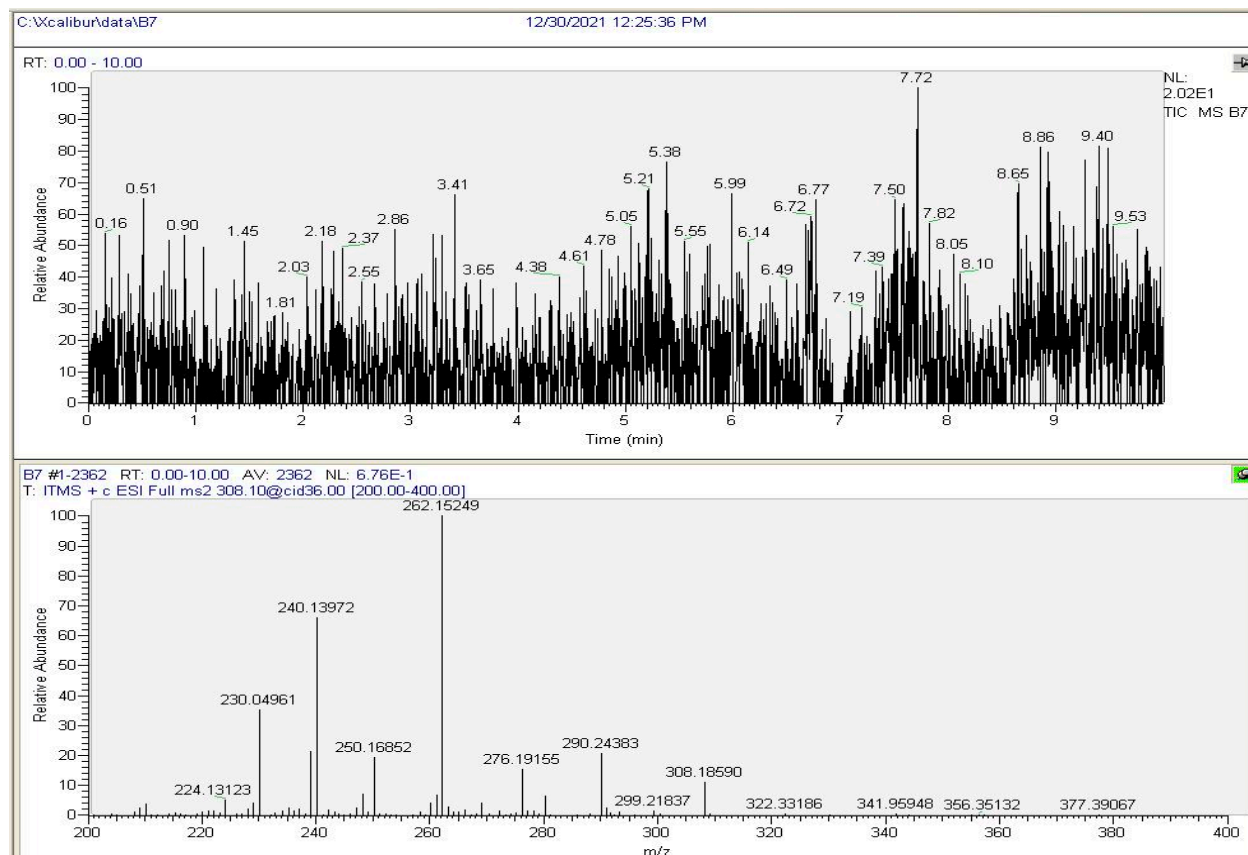

**Figure S-24:** Mass spectrum of compound 3f.



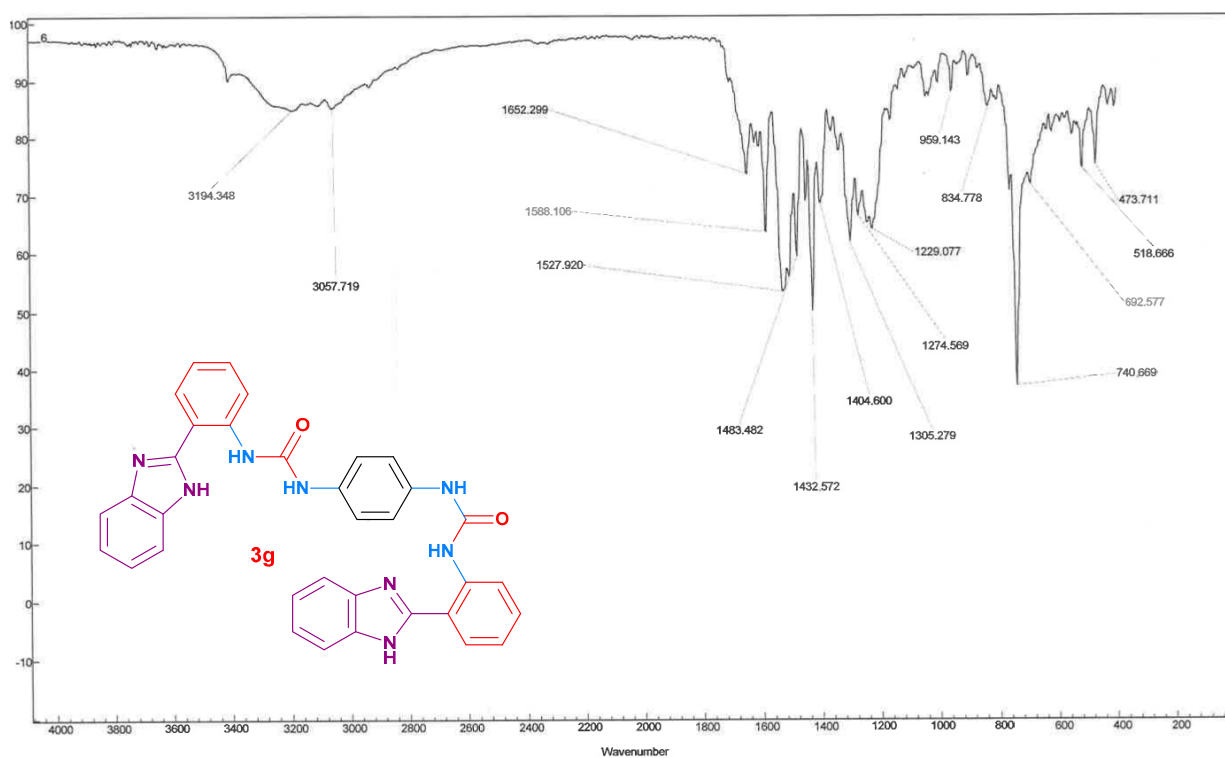

Figure S-25: FTIR spectrum of compound **3g**.

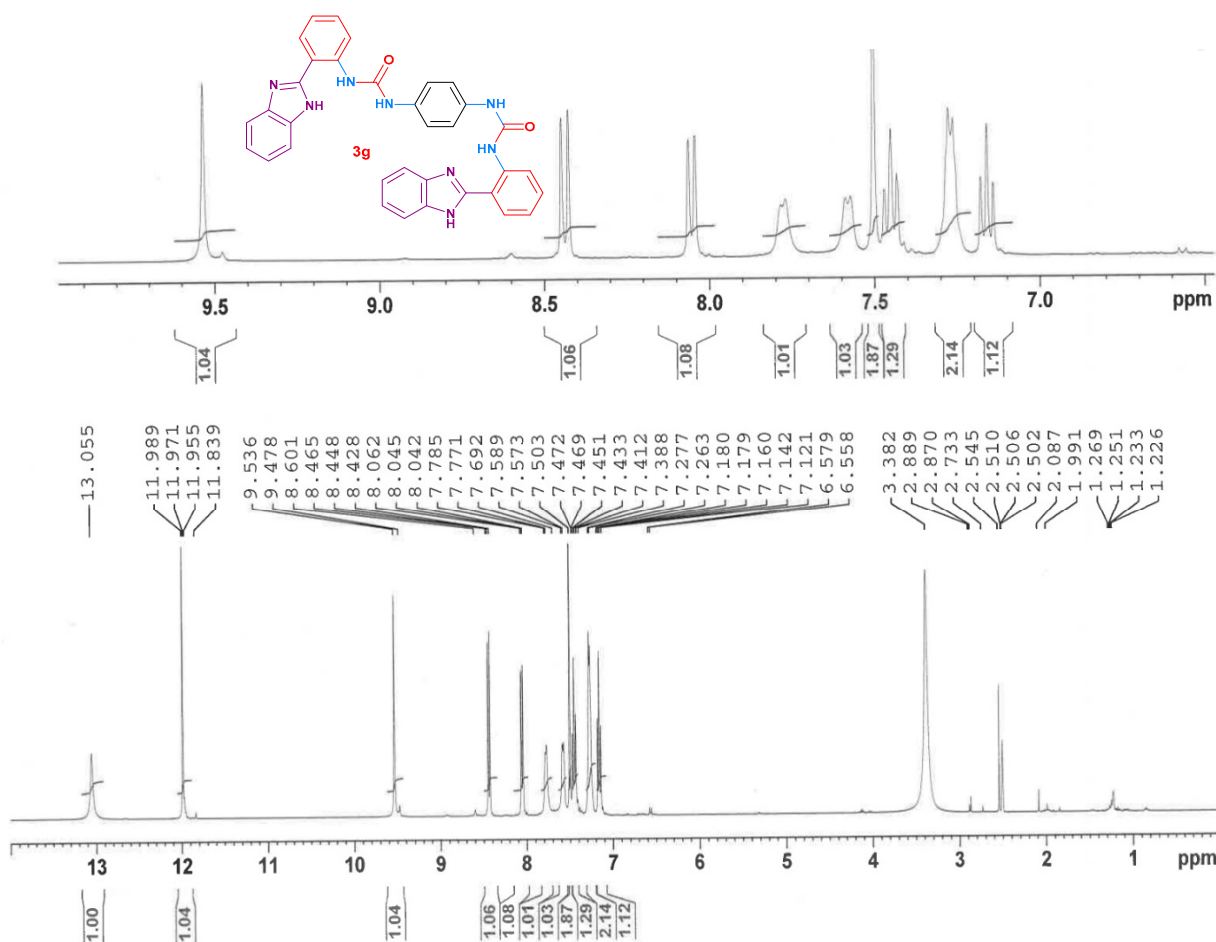

Figure S-26: <sup>1</sup>H-NMR spectrum of compound **3g**.

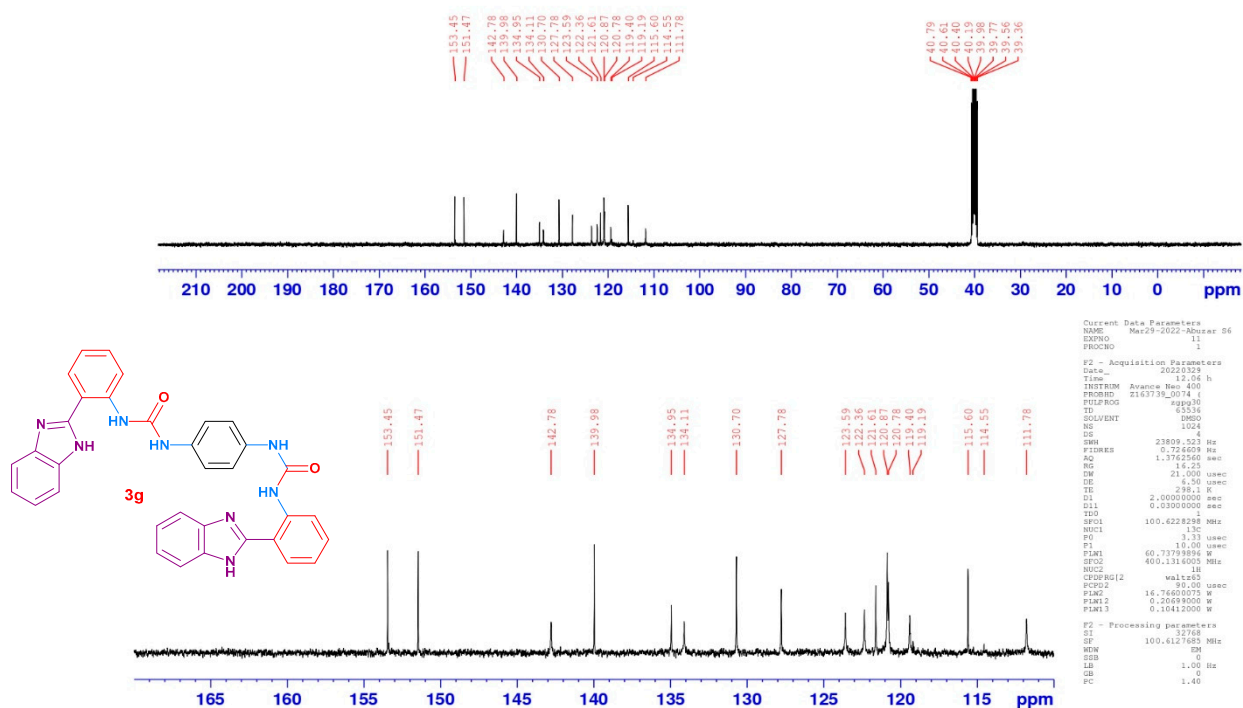

Figure S-27:  $^{13}\text{C}$  NMR spectrum of compound **3g**.

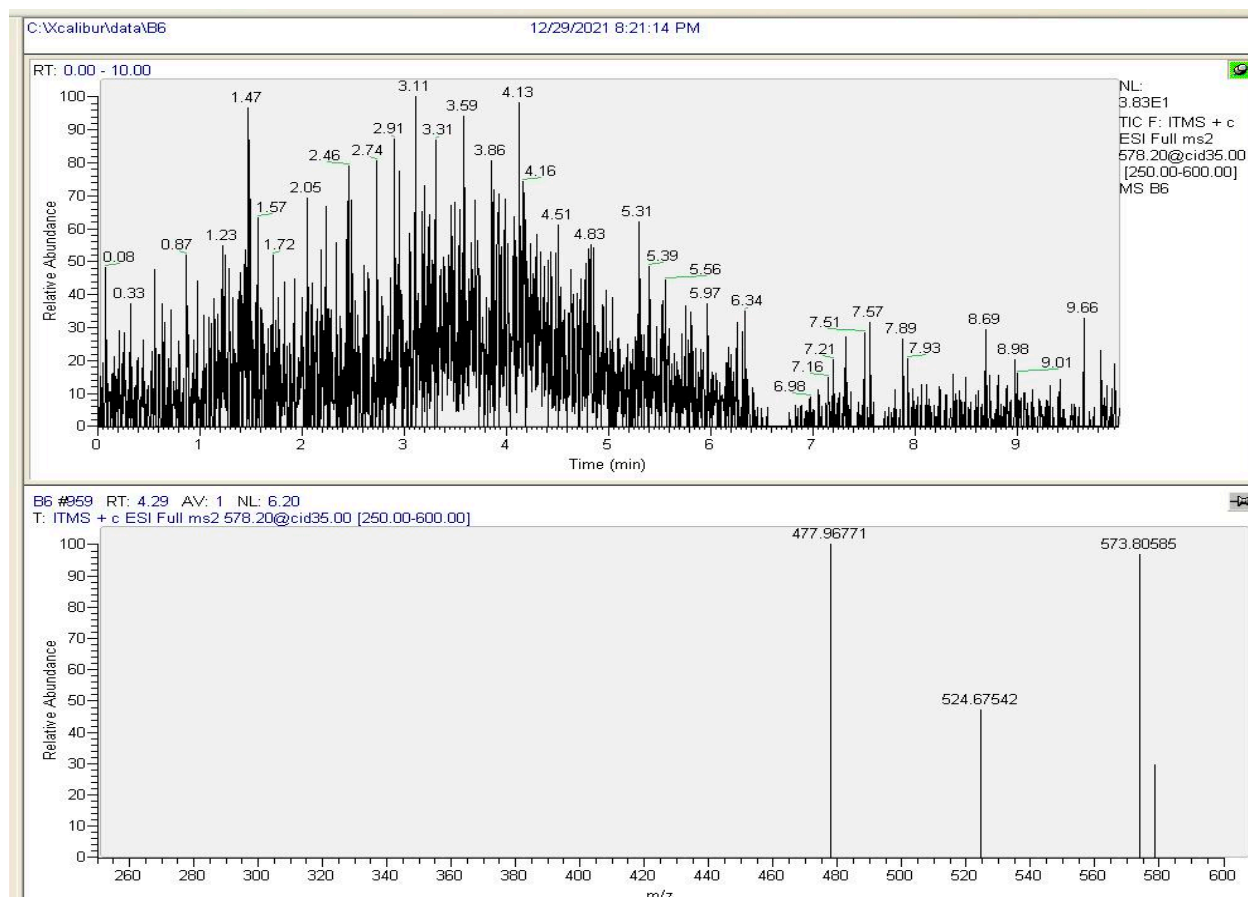

Figure S-28: Mass spectrum of compound **3g**.

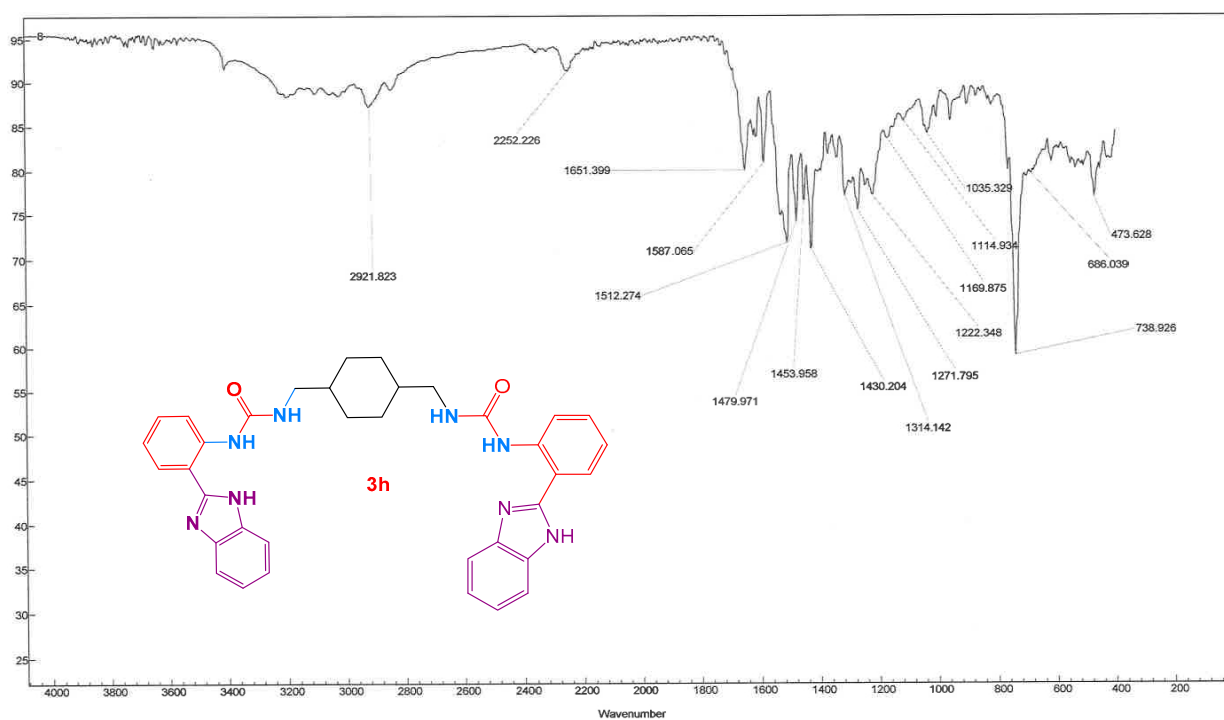

Figure S-29: FTIR spectrum of compound 3h.

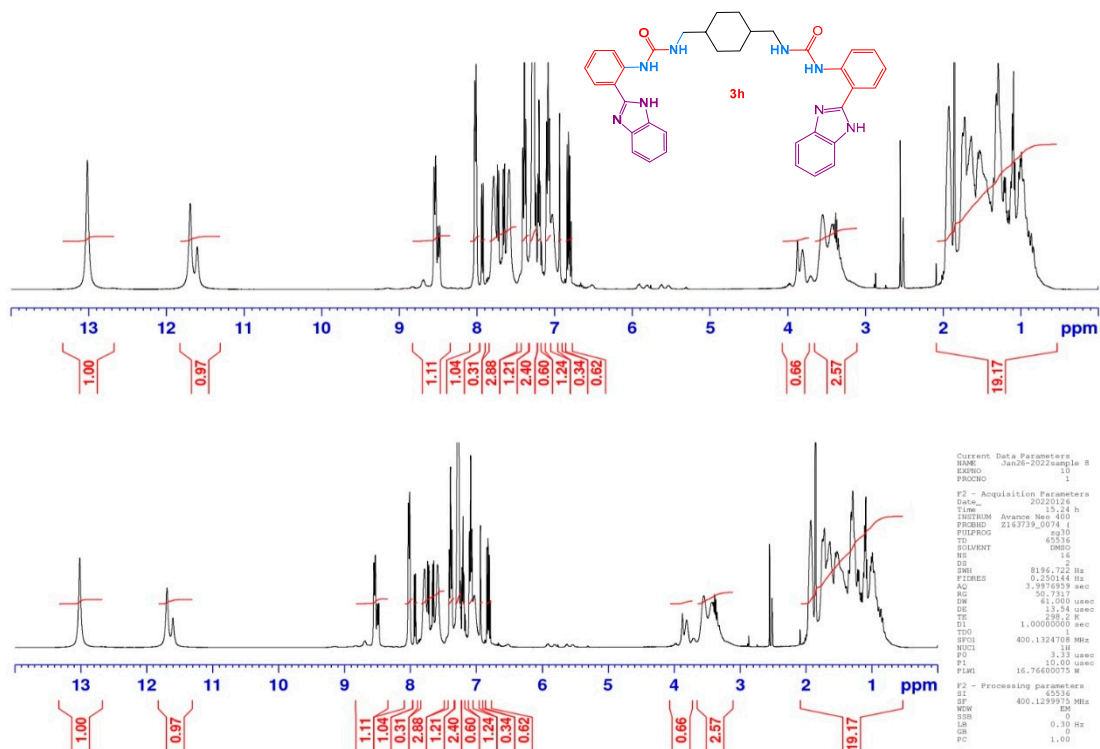

Figure S-30: <sup>1</sup>H-NMR spectrum of compound 3h.

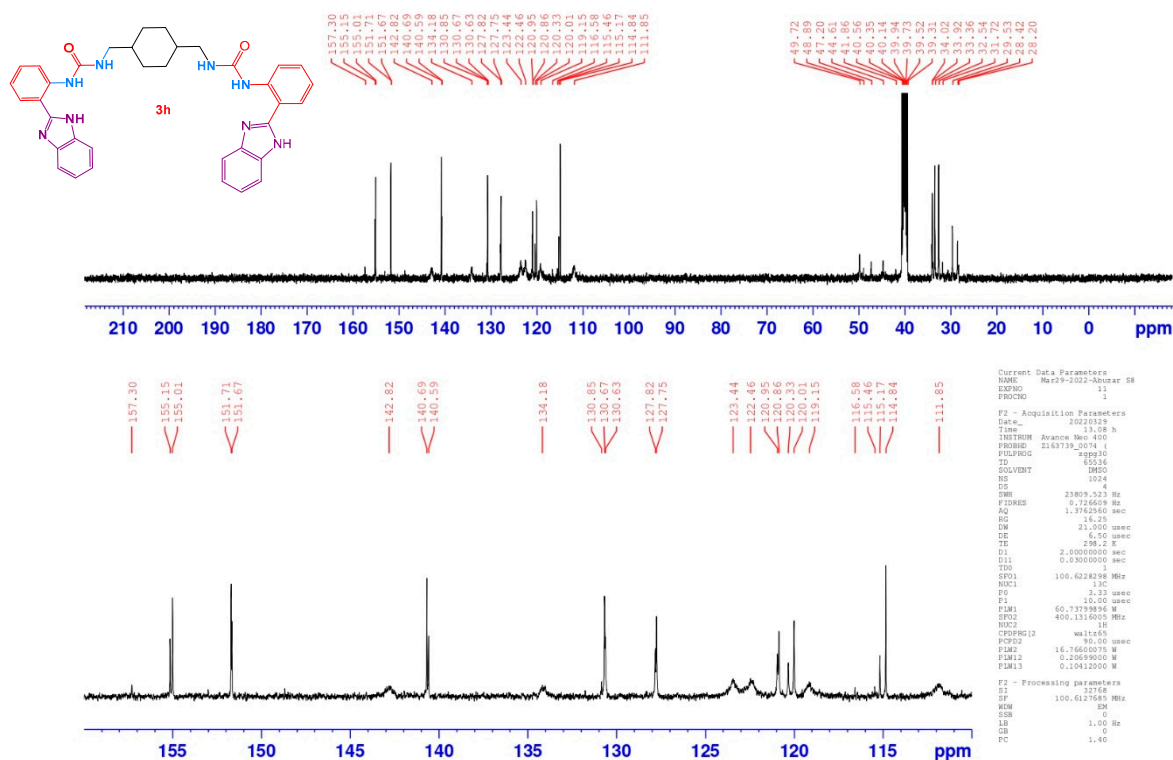

**Figure S31:**  $^{13}\text{C}$  NMR spectrum of compound 3h.

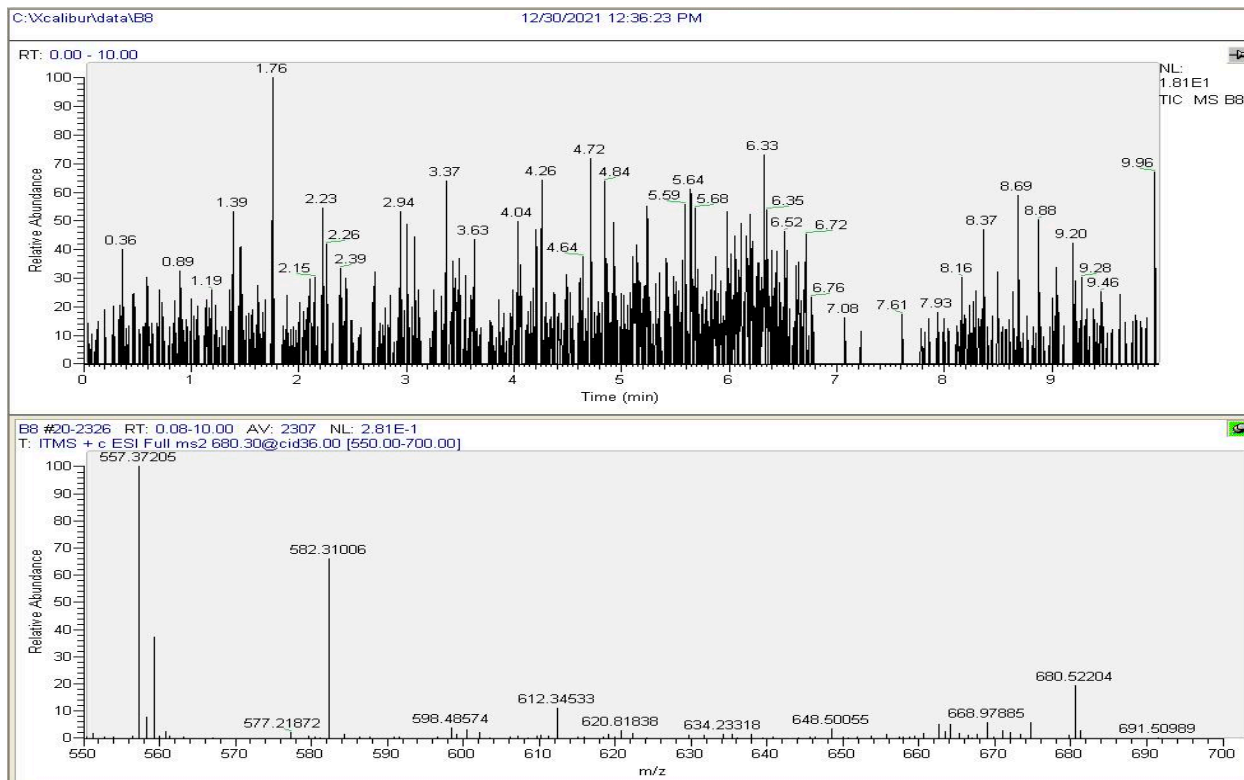

**Figure S-32:** Mass spectrum of compound 3h
